# Supplementary material for: Novel Pharmacokinetic/Pharmacodynamic Parameters Quantify the Exposure–Effect Relationship of Levofloxacin against Fluoroquinolone-Resistant Escherichia coli
Source: MDPI journal article supplement (doi:10.3390/antibiotics10060615), 2021-05-21
Supplement: s1 [file s1]

**Table S1.** Parameter estimates and parameter imprecision of a sigmoidal  $E_{\max}$  model combined with an inhibition term, describing the exposure-effect relationship of levofloxacin against 3 clinical *Escherichia coli* isolates in static and in the dynamic *in vitro* infection model experiments, stratified per exposure pattern (static exposure to 1-fold MIC, 2-fold MIC and dynamic exposure).

| Parameter [unit]                              | Estimate [RSE, %]       |                         |                          |
|-----------------------------------------------|-------------------------|-------------------------|--------------------------|
|                                               | $C_{LVX}=1 \text{ MIC}$ | $C_{LVX}=2 \text{ MIC}$ | $C_{LVX}=\text{dynamic}$ |
| <b>Sequence type 58</b>                       |                         |                         |                          |
| cumAUC <sub>50</sub> [mg·h·L <sup>-1</sup> ]  | 75.6 [10.2]             | 106 [4.87]              | 83.0 [30.5]              |
| Hill                                          | 1.31 [7.02]             | 1.34 [4.35]             | 1.28 [12.5]              |
| cumAUC <sub>reg</sub> [mg·h·L <sup>-1</sup> ] | 167 [10.8]              | 2643 [17.1]             | 87.5 [44.0]              |
| Proportional residual variability, %CV        | 0.925 [22.4]            | 0.802 [19.8]            | 4.85 [24.0]              |
| <b>Sequence type 88</b>                       |                         |                         |                          |
| cumAUC <sub>50</sub> [mg·h·L <sup>-1</sup> ]  | 12.6 [5.67]             | 19.7 [3.64]             | 32.2 [10.1]              |
| Hill                                          | 1.57 [4.77]             | 1.65 [3.95]             | 1.20 [8.04]              |
| cumAUC <sub>reg</sub> [mg·h·L <sup>-1</sup> ] | 29.7 [7.40]             | 397 [10.2]              | 615 [44.7]               |
| Proportional residual variability, %CV        | 0.737 [19.8]            | 0.580 [20.4]            | 0.695 [24.0]             |
| <b>Sequence type 167</b>                      |                         |                         |                          |
| cumAUC <sub>50</sub> [mg·h·L <sup>-1</sup> ]  | 28.9 [8.71]             | 64.6 [4.66]             | 27.2 [8.45]              |
| Hill                                          | 1.36 [8.92]             | 1.05 [4.62]             | 1.28 [7.64]              |
| cumAUC <sub>reg</sub> [mg·h·L <sup>-1</sup> ] | 333 [13.5]              | 3956 [20.3]             | 195 [14.2]               |
| Proportional residual variability, %CV        | 3.09 [17.9]             | 0.781 [17.1]            | 0.703 [26.2]             |

RSE: Relative standard error (imprecision of parameter estimates); cumAUC<sub>50</sub>: exposure, determined as cumulative area under the levofloxacin concentration-time curve, causing 50% of the maximum effect, cumAUC<sub>reg</sub>: exposure causing re-growth, MIC: minimal inhibitory concentration, Hill: Hill factor (steepness of exposure-effect relationship), CV: coefficient of variation.

**Table S2.** Antibiotic exposure at predicted maximum effect ( $E_{\max}$ ), determined as cumulative area-under-the-levofloxacin-concentration-time curve (cumAUC<sub>max</sub>), and  $E_{\max}$ , determined as cumulative area-between-the-growth-control-and-the-bacterial-killing-and-regrowth curve (cumABBC(t)), normalised to the area-under-the-growth-control curve (cumAUGC(t)), and cumulative exposure in 24 h (cumAUC(24 h)) for 3 *Escherichia coli* isolates, predictions based on the developed  $E_{\max}$  model with inhibition term, stratified per exposure pattern: static exposure to 1-fold minimal inhibitory concentration (MIC), static exposure to 2-fold MIC and dynamic exposure to a levofloxacin concentration-time profile resulting from mimicking a 750 mg, 90 min intravenous infusion in plasma in dynamic *in vitro* infection model experiments.

|                                               | $C_{LVX}=1 \text{ MIC}$ | $C_{LVX}=2 \text{ MIC}$ | $C_{LVX}=\text{dynamic}$ |
|-----------------------------------------------|-------------------------|-------------------------|--------------------------|
| <b>Sequence type 58</b>                       |                         |                         |                          |
| cumAUC <sub>max</sub> [mg·h·L <sup>-1</sup> ] | 129                     | 486                     | 105                      |
| $E_{\max}$                                    | 0.377                   | 0.747                   | 0.261                    |
| cumAUC(24 h) [mg·h·L <sup>-1</sup> ]          | 192                     | 384                     | 77.6                     |
| <b>Sequence type 88</b>                       |                         |                         |                          |
| cumAUC <sub>max</sub> [mg·h·L <sup>-1</sup> ] | 23.0                    | 76.0                    | 136                      |
| $E_{\max}$                                    | 0.406                   | 0.757                   | 0.696                    |
| cumAUC(24 h) [mg·h·L <sup>-1</sup> ]          | 48                      | 96                      | 77.6                     |
| <b>Sequence type 167</b>                      |                         |                         |                          |
| cumAUC <sub>max</sub> [mg·h·L <sup>-1</sup> ] | 96.0                    | 493                     | 74.0                     |
| $E_{\max}$                                    | 0.650                   | 0.796                   | 0.567                    |
| cumAUC(24 h) [mg·h·L <sup>-1</sup> ]          | 192                     | 384                     | 77.6                     |

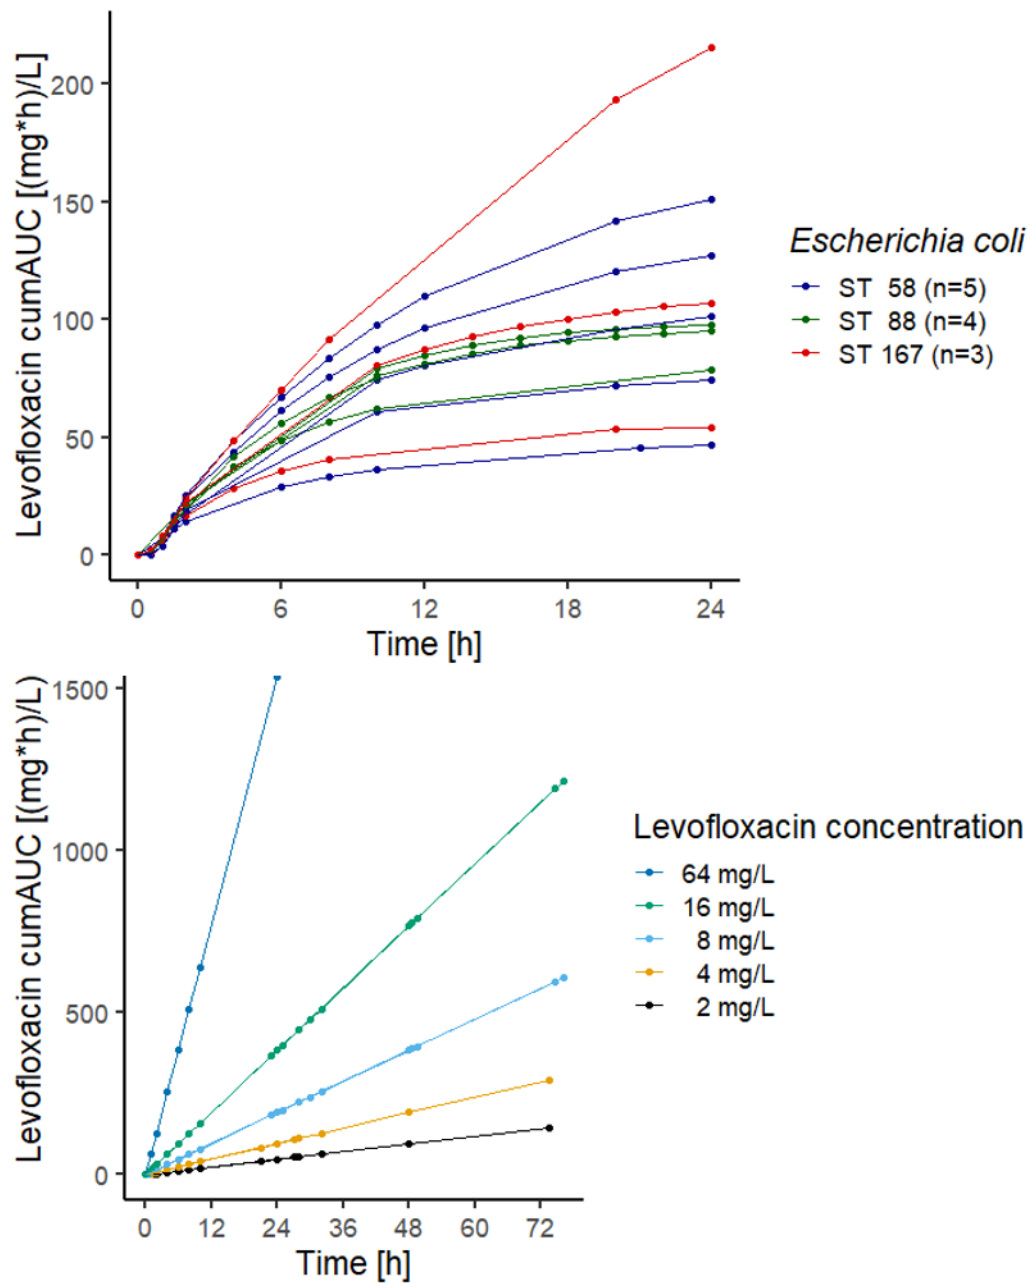

**Figure S1.** Levofloxacin exposure metric, determined as cumulative area-under-the-concentration-time curve (cumAUC) over time in *in vitro* infection model experiments, top: exposure metric over time, resulting from mimicking a 750 mg, 90 min intravenous infusion in plasma in **dynamic** *in vitro* infection model experiments (n=12 replicates), colours: 3 exposed *Escherichia coli* isolates, bottom: exposure metric over time in **static** *in vitro* infection model experiments, colours: nominal levofloxacin concentrations, points: sampling times, ST: sequence type.

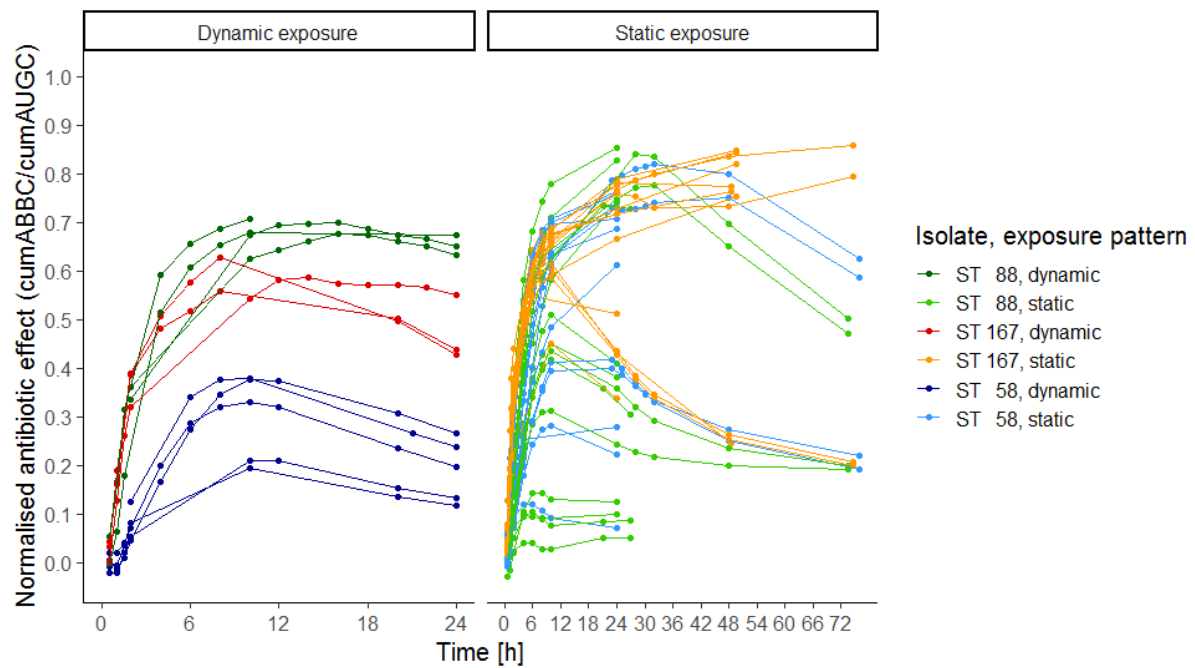

**Figure S2.** Antibiotic effect of levofloxacin against *Escherichia coli*, determined as the cumulative area-between-the-growth-control-and-the-bacterial-killing-and-regrowth curve (cumABBC(t)), normalised to the area-under-the-growth-control curve (AUGC(t)) of unexposed bacteria over time in *in vitro* infection model experiments; left: effect of levofloxacin concentration-time profiles resulting from mimicking a 750 mg, 90 min intravenous infusion in plasma in **dynamic** *in vitro* infection model experiments (n=12 replicates), right: effect of constant levofloxacin concentrations in **static** *in vitro* infection model experiments (n=43 replicates), colours: 3 *Escherichia coli* isolates under dynamic (dark green, red and blue) and static (light green, orange and light blue) exposure, points: sampling times, ST: sequence type.

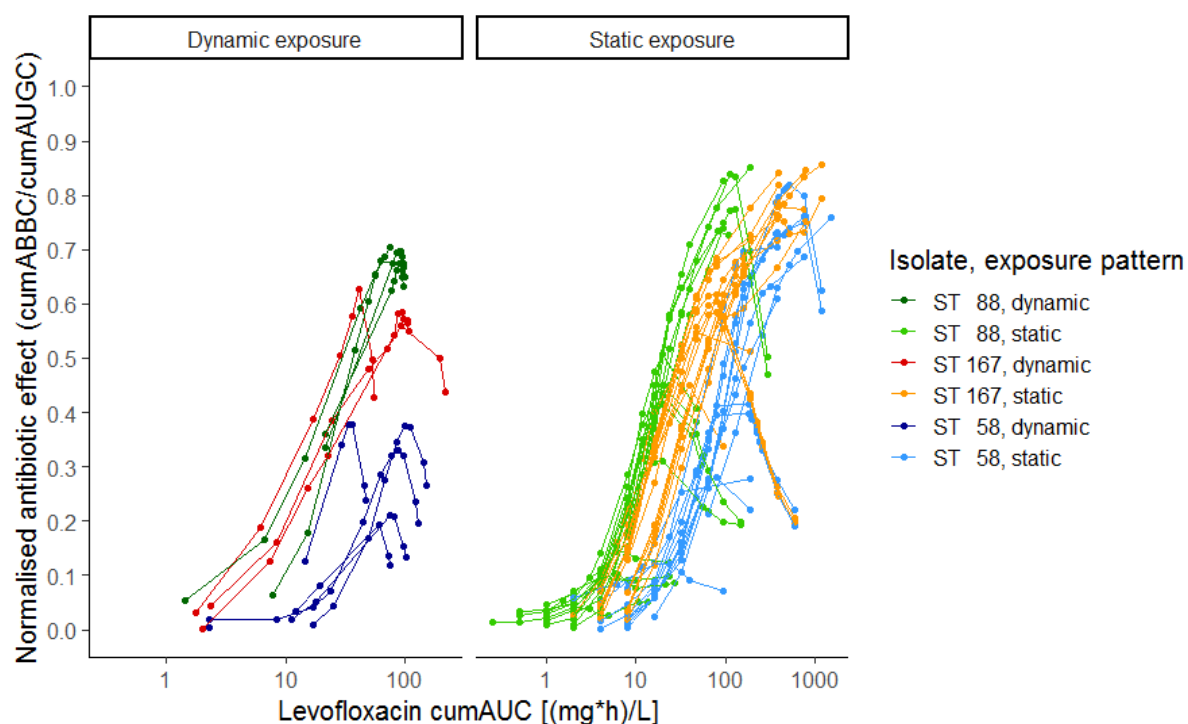

**Figure S3.** Exposure-effect relationship of levofloxacin against *Escherichia coli* in static and dynamic *in vitro* infection model experiments, exposure determined as cumulative area-under-the-concentration-time curve (cumAUC(t)), effect determined as cumulative area-between-the-growth-control-and-the-bacterial-killing-and-regrowth curve (cumABBC(t)), normalised to the area-under-the-growth-control curve (cumAUGC(t)), left: exposure-effect relationship resulting from mimicking a 750 mg, 90 min intravenous infusion in plasma in **dynamic** *in vitro* infection model experiments (n=12 replicates), right: exposure-effect relationship of constant levofloxacin concentrations in **static** *in vitro* infection model experiments (n=43 replicates), colours: 3 *Escherichia coli* isolates under dynamic (dark green, red and blue) and static (light green, orange and light blue) exposure, points: sampling times, ST: sequence type.
